# Supplementary material for: The effect of androgen receptor expression on clinical characterization of metastatic breast cancer
Source: PubMed Central journal article supplement (PMC5352433; doi:10.18632/oncotarget.14414), 2017-01-02
Supplement: oncotarget-08-8693-s001.pdf [file oncotarget-08-8693-s001.pdf]

# The effect of androgen receptor expression on clinical characterization of metastatic breast cancer

## SUPPLEMENTARY FIGURES AND TABLES

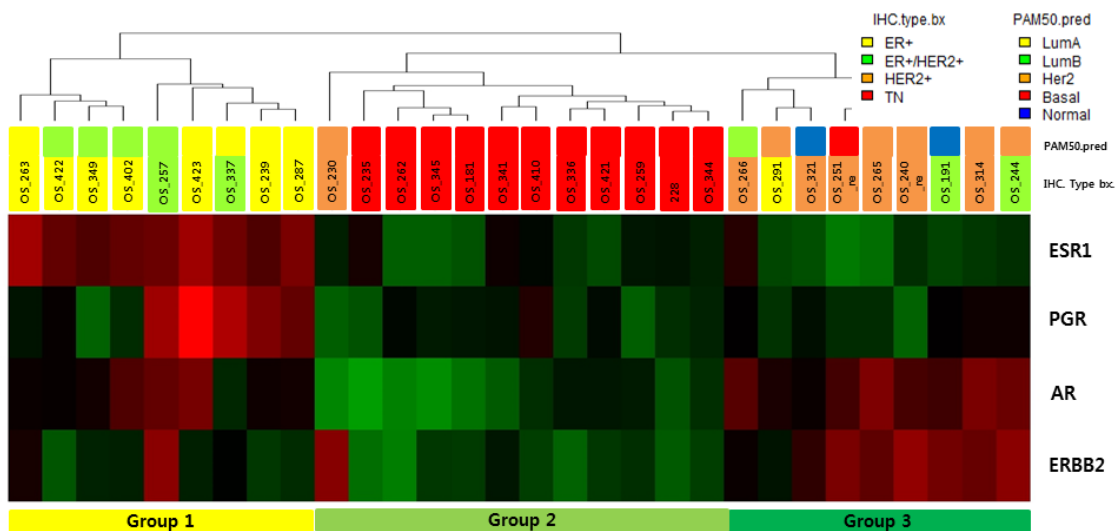

Supplementary Figure 1: nCounter gene expression assay of AR, ER, PgR and HER2 in metastatic BC.

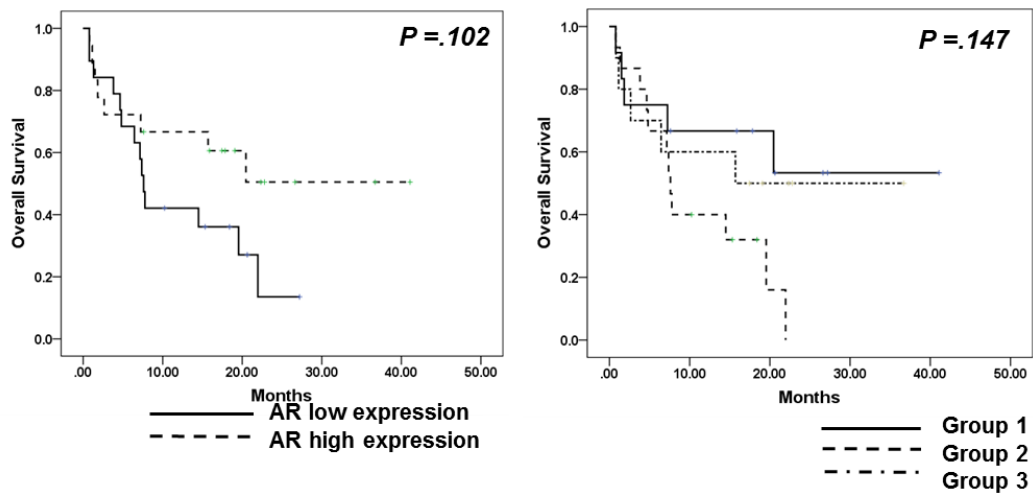

**Supplementary Figure 2:** A. Kaplan-Meier analysis of overall survival from biopsy according to AR expression; B. Kaplan-Meier analysis of overall survival from biopsy according to AR, ER, PgR and HER2 expression.

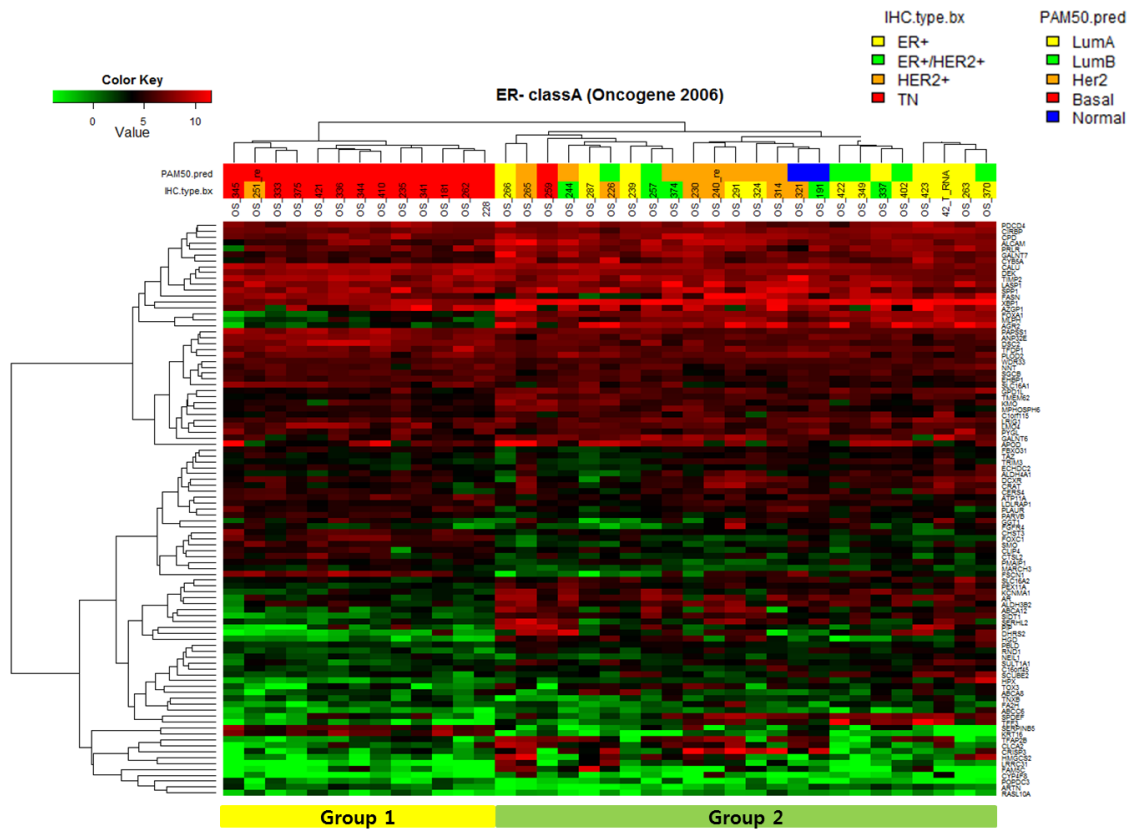

Supplementary Figure 3: Refractory BC classification using ER-Class A genes (Oncogene 2006).

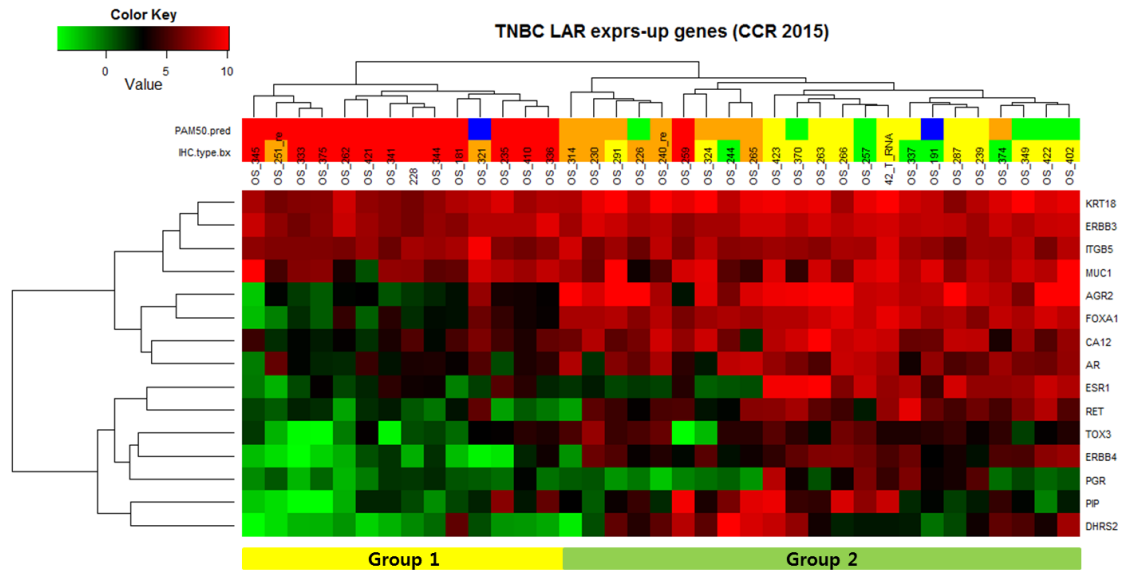

Supplementary Figure 4: Refractory BC classification using TNBC LAR genes (CCR 2015).

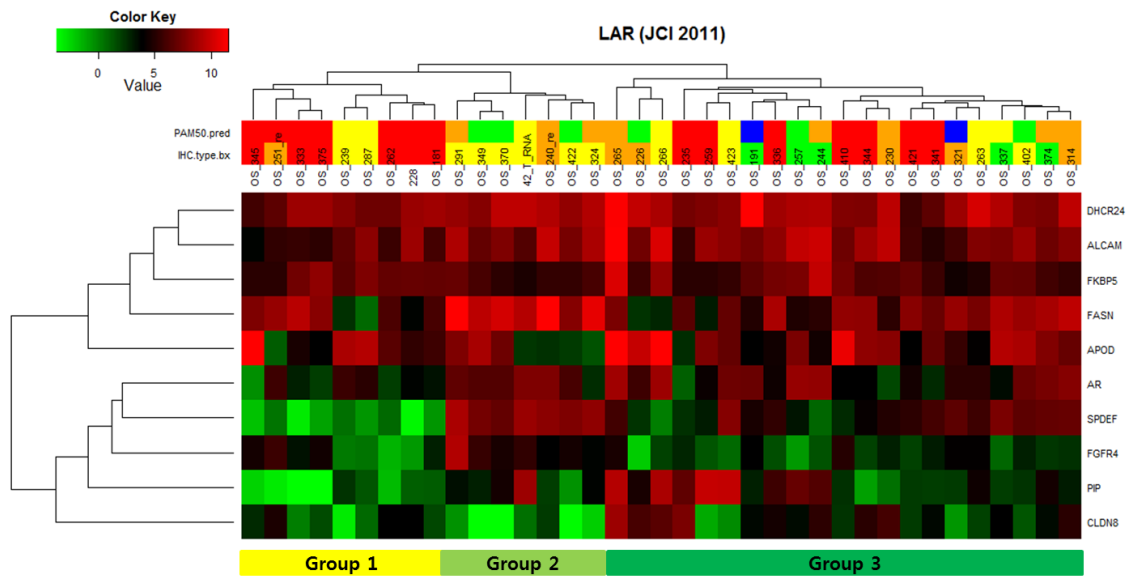

Supplementary Figure 5: Refractory BC classification using TNBC LAR genes (JCI 2011).

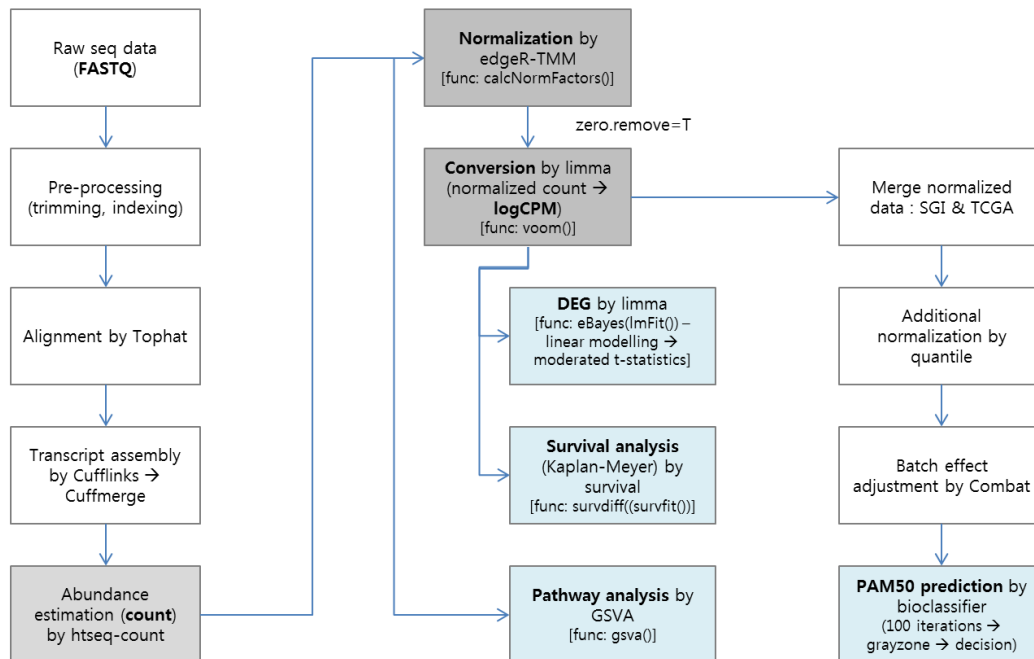

- Pipeline: PLoS Comput Biol 11(8): e1004393 (2015)
- Method comparison: Brief Bioinform. 2015 Jan;16(1):59-70
- limma for RNA-seq: Nucleic Acids Res. 2015 Apr 20;43(7):e47, Genome Biol. 2014 Feb 3;15(2):R29

- **log2-counts per million (logCPM)** with associated precision weights, by definition normalized for sequencing depth
- GSVA for RNA-seq: BMC Bioinformatics. 2013 Jan 16;14:7

Supplementary Figure 6: Pipeline of RNA-Seq data analysis.

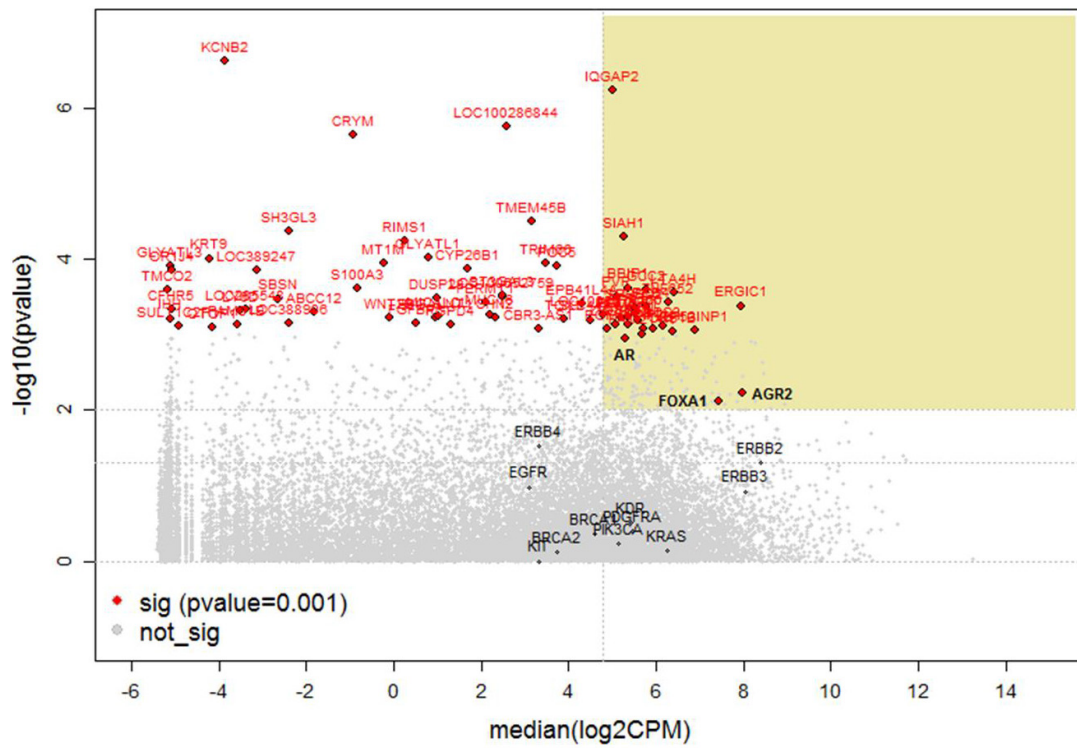

Supplementary Figure 7: Gene expression associated with BC prognosis.





Supplementary Table 1: Baseline characteristics according to AR expression (N=34)

|    | IHC type  | Intrinsic subtype | AR RNA | AR      | TP53    | PIK3CA   | BRCA1 | BRCA2    | ERBB2 amplification |
|----|-----------|-------------------|--------|---------|---------|----------|-------|----------|---------------------|
| 1  | ER+       | LumA              | up     |         |         | p.E545K  |       |          |                     |
| 2  | ER+       | LumA              | up     |         |         | p.E674Q  |       |          |                     |
| 3  | ER+       | LumA              | down   |         |         |          |       |          |                     |
| 4  | ER+       | LumA              | up     |         |         | p.E545K  |       |          |                     |
| 5  | ER+       | LumA              | down   |         | p.S176R | p.H1047R |       |          |                     |
| 6  | ER+       | Her2              | up     |         |         |          |       |          |                     |
| 7  | ER+       | Her2              | down   |         | -       |          |       |          |                     |
| 8  | ER+       | LumB              | up     |         |         | p.G1049R |       |          |                     |
| 9  | ER+       | LumB              | up     |         |         |          |       | splicing |                     |
| 10 | ER+       | LumB              | up     |         |         |          |       | p.Q3034X |                     |
| 11 | ER+/HER2+ | Normal            | up     |         |         |          |       |          |                     |
| 12 | ER+/HER2+ | Her2              | up     |         |         | p.H1047R |       |          | AMP                 |
| 13 | ER+/HER2+ | LumB              | up     |         |         | p.H1047R |       |          | AMP                 |
| 14 | ER+/HER2+ | LumA              | down   |         |         |          |       |          | AMP                 |
| 15 | ER+/HER2+ | Her2              | up     |         |         | p.H1047R |       |          | AMP                 |
| 16 | HER2+     | LumB              | up     |         | p.Y181C |          |       |          |                     |
| 17 | HER2+     | Her2              | down   |         |         |          |       |          |                     |
| 18 | HER2+     | Her2              | up     |         | p.R234H | p.H1047R |       |          | AMP                 |
| 19 | HER2+     | Basal             | up     |         |         |          |       |          | AMP                 |
| 20 | HER2+     | Her2              | up     |         | p.V235L |          |       |          | AMP                 |
| 21 | HER2+     | Her2              | up     |         | p.L155R |          |       |          | AMP                 |
| 22 | HER2+     | Normal            | down   |         |         |          |       |          | AMP                 |
| 23 | TN        | Basal             | down   |         |         |          |       |          |                     |
| 24 | TN        | Basal             | down   |         | p.R136H |          |       |          |                     |
| 25 | TN        | Basal             | down   |         | p.Y181C |          |       |          |                     |
| 26 | TN        | Basal             | down   | p.R102T |         | p.H1047R |       | splicing |                     |
| 27 | TN        | Basal             | down   |         | p.E247V |          |       |          |                     |
| 28 | TN        | Basal             | down   |         | p.C203G |          |       |          |                     |
| 29 | TN        | Basal             | down   |         |         |          |       |          |                     |
| 30 | TN        | Basal             | down   |         | p.R234H |          |       | p.T656S  |                     |
| 31 | TN        | Basal             | down   |         | p.R157X |          |       |          |                     |
| 32 | TN        | Basal             | down   |         | -       |          |       |          |                     |
| 33 | TN        | Basal             | down   |         |         |          |       |          |                     |
| 34 | TN        | Basal             | down   |         | p.R71P  |          |       |          |                     |

Supplementary Table 2: Genetic alterations according to AR expression (N=34)

| Mutated gene | Mean. In<br>group mutation | Mean. In<br>group wildtype | Diff(mut-wild) | t.test fdr |
|--------------|----------------------------|----------------------------|----------------|------------|
| ACACB        | 2.955                      | 5.296                      | -2.341         | 0.21343    |
| EVC          | 6.724                      | 4.932                      | 1.982          | 0.30411    |
| GNAS         | 7.134                      | 4.892                      | 2.242          | 0.21343    |
| LRRIQ1       | 7.109                      | 4.820                      | 2.289          | 0.12427    |
| MUC16        | 7.201                      | 4.808                      | 2.393          | 0.01303    |
| PCLO         | 2.921                      | 5.300                      | -2.379         | 0.18242    |
| PIK3CA       | 6.945                      | 4.317                      | 2.628          | 0.01694    |
| TP53         | 4.446                      | 6.270                      | -1.824         | 0.18242    |
| TRIO         | 7.703                      | 4.741                      | 2.962          | 0.21343    |
| TTN          | 6.623                      | 4.761                      | 1.862          | 0.18756    |
